# Supplementary material for: Degenerate T-cell Recognition of Peptides on MHC Molecules Creates Large Holes in the T-cell Repertoire
Source: PubMed Central journal article supplement (PMC3291541; doi:10.1371/journal.pcbi.1002412), 2012-03-01
Supplement: pcbi.1002412.s001.pdf [file pcbi.1002412.s001.pdf]

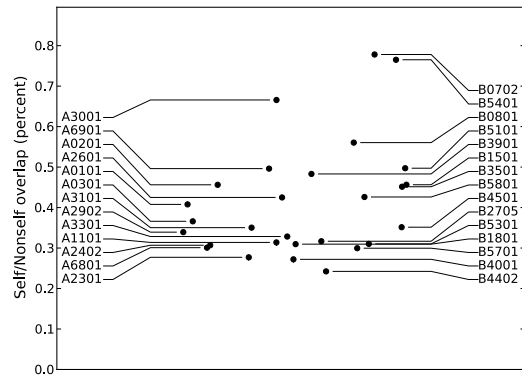

**Figure S1: Self/nonself overlaps based on non-anchor positions.** For different HLA molecules, the exact self/nonself overlap was determined based on non-anchor positions (P1 and P3-8). The average overlap was 0.4%.
