# Supplementary material for: Degenerate T-cell Recognition of Peptides on MHC Molecules Creates Large Holes in the T-cell Repertoire
Source: PLoS Comput Biol. 2012 Mar 1;8(3):e1002412. doi: 10.1371/journal.pcbi.1002412 (PMC3291541; doi:10.1371/journal.pcbi.1002412)
Supplement: Table S1 — Human proteins that overlap with more than expected bacteria and viruses. Human proteins that overlap at the 9mer level with a significantly large number of viruses or bacteria were analyzed using the on-line annotation analyzer DAVID [26], [27]. For the 10 most enriched non-redundant annotation clusters, the category encompassing most proteins is shown. All categories were significantly enriched (p10). (PDF) [file pcbi.1002412.s003.pdf]

| Human proteins overlapping with bacteria (n=2055; 1726 found in DAVID) |                                                             |                    |
|------------------------------------------------------------------------|-------------------------------------------------------------|--------------------|
| Cluster                                                                | Description                                                 | Number of proteins |
| 1                                                                      | nucleotide binding                                          | 525                |
| 2                                                                      | mitochondrion                                               | 276                |
| 3                                                                      | ATPase, AAA+ type, core                                     | 95                 |
| 4                                                                      | ATPase activity                                             | 137                |
| 5                                                                      | membrane-enclosed lumen                                     | 281                |
| 6                                                                      | NAD(P)-binding domain                                       | 72                 |
| 7                                                                      | monosaccharide metabolic process                            | 62                 |
| 8                                                                      | magnesium ion binding                                       | 100                |
| 9                                                                      | fatty acid metabolic process                                | 54                 |
| 10                                                                     | mitochondrial part                                          | 160                |
| Human proteins overlapping with viruses (n=722; 590 found in DAVID)    |                                                             |                    |
| Cluster                                                                | Description                                                 | Number of proteins |
| 1                                                                      | nucleus                                                     | 299                |
| 2                                                                      | transcription factor activity                               | 116                |
| 3                                                                      | membrane-enclosed lumen                                     | 112                |
| 4                                                                      | regulation of transcription from RNA polymerase II promoter | 85                 |
| 5                                                                      | RNA binding                                                 | 58                 |
| 6                                                                      | pattern specification process                               | 35                 |
| 7                                                                      | negative regulation of macromolecule metabolic process      | 51                 |
| 8                                                                      | non-membrane-bounded organelle                              | 95                 |
| 9                                                                      | transcription factor binding                                | 48                 |
| 10                                                                     | compositionally biased region: Arg/Ser-rich (RS domain)     | 10                 |

**Table S1. Human proteins that overlap with more than expected bacteria and viruses.**

Human proteins that overlap at the 9mer level with with a significantly large number of viruses or bacteria were analyzed using the on-line annotation analyzer DAVID [26,27]. For the 10 most enriched non-redundant annotation clusters, the category encompassing most proteins is shown. All categories were significantly enriched ( $p < 0.0001$ ).
